# Supplementary material
Source: HighWire-hosted journal article supplement (https://lupus.bmj.com/content/5/1/e000264)
Supplement: inline-supplementary-material-1 [file inline-supplementary-material-1.docx]

Table S1: Historical and patient Data

| **Patient** | **Historical ACR SLE criteria** | **Ethnicity** | **Age (years)** | **Years since SLE diagnosis** |
| --- | --- | --- | --- | --- |
| 1 | ANA, dsDNA, Sm, photo, OU, arthritis, serositis, renal, heme | AA | 34 | 22 |
| 2 | ANA, malar, photo, OU, arthritis, serositis | AA | 72 | 21 |
| 3 | ANA, dsDNA, malar, arthritis, heme | AA | 53 | 30 |
| 4 | ANA, dsDNA, APL, arthritis, serositis, heme | AA | 23 | 1 |
| 5 | ANA, dsDNA, malar, discoid, OU, arthritis, serositis, heme | AA | 52 | 23 |
| 6 | ANA, Sm, malar, photo, OU, arthritis, serositis, heme | AA | 34 | 1 |
| 7 | ANA, dsDNA, APL, arthritis, serositis | H | 48 | 18 |
| 8 | ANA, dsDNA, Sm, photo, OU, arthritis | H | 23 | 0 |
| 9 | ANA, Sm, photo, arthritis | AA | 23 | 1 |
| 10 | ANA, dsDNA, Sm, arthritis, heme | AA | 21 | 1 |
| 11 | ANA, arthritis, photo/malar, serositis, nephritis | AA | 22 | 1 |
| 12 | ANA, dsDNA, arthritis, serositis, heme | AA | 70 | 12 |
| 13 | ANA, dsDNA, photo/malar, OU, arthritis | AA | 29 | 2 |
| 14 | ANA, Sm, photo/malar, arthritis, heme | AA | 54 | 10 |
| 15 | ANA, photo/malar, OU, arthritis | W | 50 | 25 |
| 16 | ANA, dsDNA, Sm, photo/malar, arthritis, heme | AA | 32 | 0 |
| 17 | ANA, Sm, discoid, arthritis | AA | 29 | 2 |
| 18 | ANA, dsDNA, photo, arthritis | AA | 43 | 5 |
| 19 | ANA, dsDNA, Sm, OU, arthritis | W | 62 | 4 |
| 20 | ANA, Sm, photo/malar, arthritis | A | 46 | 0 |

Photo: photosensitivity; Sm: anti-smith; APL: antiphospholipid antibodies; photo: photosensitive rash, OU: oral/nasal ulcers; heme: hematologic. Ethnicity: AA (African American), H (Hispanic), W (white), A (Asian).
